# Supplementary material
Source: publisher site journal article supplement (https://www.spandidos-publications.com/7546/downloadSupplementary)
Supplement: Supplementary file 1 [file downloadSupplementary]

Table I. Baseline characteristics of the patients (n=1,238).

| Characteristics                     | Value         |
|-------------------------------------|---------------|
| Age, years                          | 42.82±10.70   |
| Male sex                            | 915 (73.91)   |
| Ear symptom                         | 506 (40.87)   |
| Allergy history                     | 93 (7.51)     |
| Smoking                             | 357 (28.84)   |
| BMI, kg/m <sup>2</sup>              | 23.05±3.41    |
| Pretreatment mastoid mucosa disease |               |
| 0                                   | 887 (71.65)   |
| 1                                   | 80 (6.46)     |
| 2                                   | 271 (21.89)   |
| T stage                             |               |
| 1-2                                 | 275 (22.21)   |
| 3-4                                 | 963 (77.79)   |
| N stage                             |               |
| 0                                   | 138 (11.15)   |
| 1-3                                 | 1,100 (88.85) |
| Stage                               |               |
| I-II                                | 161 (13.00)   |
| III-IV                              | 1,077 (87.00) |
| Ipsilateral wall                    | 897 (72.46)   |
| PR                                  | 956 (77.22)   |
| POET                                | 523 (42.25)   |
| LVPM                                | 713 (57.59)   |
| TVPM                                | 460 (37.16)   |
| IMRT                                | 1,162 (93.86) |
| Mastoid Dmean, Gy                   | 37.87±6.68    |
| Mastoid volume, mm <sup>2</sup>     | 13.73±4.81    |
| Total dose, Gy                      | 69.73±1.08    |
| Total fractions                     | 31.10±1.36    |
| Chemotherapy                        | 1,145 (92.49) |
| Targeted therapy                    | 229 (18.50)   |
| Recurrence of nasopharynx           | 116 (9.37)    |
| Reradiation                         | 67 (5.41)     |
| Budesonide                          | 528 (42.65)   |
| Ambroxol                            | 733 (59.21)   |
| Myrtol                              | 237 (19.14)   |
| Clarityne                           | 133 (10.74)   |
| Nasal irrigation                    | 635 (51.29)   |
| WBC, x10 <sup>9</sup> /l            | 6.10±2.63     |
| Neutrophils, x10 <sup>9</sup> /l    | 3.79±2.29     |
| Monocytes, x10 <sup>9</sup> /l      | 0.50±1.58     |
| Lymphocytes, x10 <sup>9</sup> /l    | 1.71±0.65     |
| Eosinophils, x10 <sup>9</sup> /l    | 0.11±0.12     |

|           |              |
|-----------|--------------|
| SAA, mg/l | 9.23±31.13   |
| CRP, mg/l | 4.34±9.79    |
| LDH, U/l  | 178.12±49.27 |

Values are expressed as the mean ± standard deviation or n (%). BMI, body mass index; PR, pharyngeal recess; POET, pharyngeal opening of eustachian tube; LVPM, levator veli palatine muscle; TVPM, tensor veli palatine muscle; IMRT, intensity modulated radiotherapy; mastoid Dmean, mean dose to the ipsilateral mastoid; WBC, white blood cell; SAA, serum amyloid A; CRP, C-reactive protein; LDH, lactate dehydrogenase.

Table SII. ROC curve of mastoid parameters significantly associated with persistent Grade 2 mastoid mucosa disease for patients with nasopharyngeal carcinoma without pretreatment mastoiditis and nasopharyngeal recurrence.

| Variable       | AUC  | 95%CI     | Cutoff point          | Sensitivity | Specificity |
|----------------|------|-----------|-----------------------|-------------|-------------|
| Mastoid Dmean  | 0.58 | 0.52-0.64 | 37.30 Gy              | 0.48        | 0.67        |
| Mastoid volume | 0.53 | 0.47-0.58 | 18.45 mm <sup>2</sup> | 0.88        | 0.20        |

ROC, receiver operating characteristic; AUC, area under the ROC curve; mastoid Dmean, mean dose to the ipsilateral mastoid; mastoid volume, the volume of the ipsilateral mastoid.
